# Supplementary material for: Perspectives of People Living with Idiopathic Pulmonary Fibrosis: A Qualitative and Quantitative Study
Source: Research Square preprint supplement (doi:10.21203/rs.3.rs-6190511/v1), 2025-04-02
Supplement: Supplementary file 1 [file 7286320ad1cd9dd6cfdf508b.docx]

**CONFIDENTIALITY & PARTICIPATION AGREEMENT**

The undersigned agrees to participate in a health two-part research project to explore 1) examining the experiences of people living with IPF and unmet needs in this condition. and 2) conducting market research. He/she will receive from **Sago and its Client (research team)** compensation for participating and completing the above-mentioned study pursuant to the following terms and conditions.

Taking part in this project is voluntary and the questionnaire will be for researching the IPF patient experience, unmet needs and market research purposes only in order to better understand challenges faced by people living with IPF. The risks involved with this survey are that some of the questionnaire items may make you feel uncomfortable, but you are free to withdraw from participating at any time. The information that you provide is confidential and your identity will not be revealed to the research team.

The undersigned agrees, without further compensation, that any of his or her suggestions and ideas, whether verbal, written or recorded, including responses to research surveys, /interviews, as well as any likeness or voice impressions of participant resulting from the study, via audio taping, transcripts, or any other means, shall become the sole property of the research team.

The undersigned also acknowledges and agrees that any information which the undersigned may observe, acquire or otherwise be exposed to concerning the subject of the study is CONFIDENTIAL information of the research team and participant shall not disclose any such information to any third parties, including friends and family members. Undersigned has been informed that the questionnaire will be used for research and documentation purposes. Sago will maintain this signed consent form and will not share the details of this form with the research team.

Do you agree to the above?

|  |  | **[SELECT ONE]** |
| --- | --- | --- |
|  | Yes | O |
|  | No **[DISQUALIFY]** | O |

# Screener

1. What is your current lung diagnosis from a doctor?

|  | **[Randomize Rows]** | **[SELECT ALL THAT APPLY]** |
| --- | --- | --- |
| **1** | Chronic obstructive pulmonary disease (COPD) | □ |
| **2** | Asthma | □ |
| **3** | Emphysema | □ |
| **4** | Idiopathic pulmonary fibrosis (IPF) **[DISQUALIFY IF NOT SELECTED]** | □ |
| **5** | Lung fibrosis due to a connective tissue disorder like rheumatoid arthritis **[DISQUALIFY]** | □ |
| **6** | Pulmonary fibrosis other than IPF (idiopathic pulmonary fibrosis) **[DISQUALIFY]** | □ |
| **7** | None of the above **[DISQUALIFY] [ANCHOR]** | □ |

1. What time period were you diagnosed with IPF?

|  | ___ year **[FORCE 4 NUMBERS: 1000-9999]**  **[DISQUALIFY IF NOT 2010-2023]** |
| --- | --- |
|  | _______ month **[January-December + Uncertain as a choice] DROPDOWN** |

1. Since diagnosis, what treatments have you taken for your IPF?

|  | **[Randomize Rows]** | **[SELECT ALL THAT APPLY]** |
| --- | --- | --- |
| **1** | Esbriet (pirfenidone) / Pirfenidone | □ |
| **2** | Ofev (nintedanib) | □ |
| **3** | Rituxan **[DISQUALIFY]** | □ |
| **4** | Actemra (tocilizumab) **[DISQUALIFY]** | □ |
| **5** | TNF inhibitors: Remicade (infliximab), Enbrel (etanercept), Humira (adalimumab) Cimzia (certolizumab pegol) and Simponi (golimumab) **[DISQUALIFY]** | □ |
| **6** | JAK inhibitors: Olumiant (baricitinib), Xeljanz (tofacitinib), and Rinvoq (upadacitinib) **[DISQUALIFY]** | □ |
| **7** | Methotrexate, azathioprine and / or mycophenolate [**DISQUALIFY]** | □ |
| **8** | None of the above **[DISQUALIFY IF SELECTED WITH 1 OR 2] [EXCLUSIVE]** | □ |

1. What is your age?

|  | ___ # years **[FORCE 2 NUMBERS] [TERMINATE <40 YRS]**  **[NO MORE THAN 10% THAT ARE <50 YRS]** |
| --- | --- |

1. What was your sex assigned at birth?

|  | **[Randomize Rows]** | **[SELECT ONE]** |
| --- | --- | --- |
| **1** | Male | O |
| **2** | Female | O |

1. What race or ethnicity best describes you?

|  | **[Randomize Rows]** | **[SELECT ONE]** |
| --- | --- | --- |
| **1** | White or Caucasian | O |
| **2** | Black or African American | O |
| **3** | Native American / American Indian or Alaskan Native | O |
| **4** | Asian, Native Hawaiian or Other Pacific Islander | O |
| **5** | Hispanic | O |
| **6.** | More than one race / ethnicity **[ANCHOR]** | O |

1. What is your primary insurance? Please select what type of insurance you have and do not provide any additional information.

|  | **[Randomize Rows]** | **[SELECT ONE]** |
| --- | --- | --- |
| **1** | Medicare | O |
| **2** | Medicaid | O |
| **3** | Commercial / private | O |
| **4** | Uninsured | O |
| **5** | VA (Veterans Administration) / TriCare | O |
| **6** | Other (please specify) | O |

1. Can you describe the area you live in?

|  | **[Randomize Rows]** | **[SELECT ONE]** |
| --- | --- | --- |
| **1** | Urban / Suburban | O |
| **2** | Rural | O |

1. What region of the United States do you live in?

|  | **[Randomize Rows]** | **[SELECT ONE]** |
| --- | --- | --- |
| **1** | Northeast | O |
| **2** | Southeast | O |
| **3** | Southwest | O |
| **4** | Midwest | O |
| **5** | West (including Alaska and Hawaii) | O |
| **6** | Northwest | O |
| **7** | Mid-Atlantic | O |

1. Have you ever gotten a lung transplant?

|  | [Randomize Rows] | **[SELECT ONE]** |
| --- | --- | --- |
|  | Yes **[DISQUALIFY]** | O |
|  | No | O |

1. Are you currently participating in a clinical trial of a new drug?

|  | [Randomize Rows] | **[SELECT ONE]** |
| --- | --- | --- |
|  | Yes **[DISQUALIFY]** | O |
|  | No | O |

1. What is your highest level of education?

|  | [Randomize Rows] | **[SELECT ONE]** |
| --- | --- | --- |
| **1.** | No high school diploma / GED | O |
| **2** | High school diploma / GED | O |
| **3** | College degree | O |
| **4** | Advanced degree | O |

# Journey to IPF Diagnosis

1. How long was it from the time you first started experiencing symptoms to when you spoke with a healthcare provider (doctor, nurse etc.) (HCP)? [PARTICIPANT CAN FILL OUT EITHER ONE OR BOTH OPTIONS OR SELECT NA]

|  | ___ # years [FORCE 1-2 NUMBERS: RANGE 0-20] | ___ # months [FORCE 1-2 NUMBERS, RANGE 0-11] DO NOT ALLOW NUMBER >11] | Not Applicable O |
| --- | --- | --- | --- |

1. How long was it from the time you first discussed your lung problem with an a healthcare provider (doctor, nurse etc.) (HCP) to your IPF diagnosis? [PARTICIPANT CAN FILL OUT EITHER ONE OR BOTHOPTIONS OR SELECT NA]

|  | ___ # years [FORCE 1-2 NUMBERS: RANGE 0-20] | ___ # months [FORCE 1-2 NUMBERS, RANGE 0-11] DO NOT ALLOW NUMBER >11] | Not Applicable O |
| --- | --- | --- | --- |

1. How many different health care providers (doctor, nurse etc.) did you see for your lung problem before you were diagnosed with IPF?

| **1.** | ___ # healthcare provider (HCP) **[FORCE 1-2 NUMBERS: 0-20]** |
| --- | --- |

1. What type of doctor first told you about your IPF diagnosis ultimately diagnosed you with IPF?

|  | **[Randomize Rows]** | **[SELECT ONE]** |
| --- | --- | --- |
| **1.** | Pulmonologist (lung doctor) at an expert IPF or interstitial lung disease (ILD) center of excellence (i.e., affiliated with a university) | O |
| **2** | Pulmonologist (lung doctor) at a community private practice / doctors office | O |
| **3** | Primary care physician | O |
| **4** | Radiologist | O |
| **5** | Cardiologist (heart doctor) | O |
| **6** | Rheumatologist | O |
| **7** | Gastroenterologist | O |
| **8** | Ear Nose and Throat doctor (ENT) | O |
| **9** | Other (please specify) | O |
| **10** | Unable to recall | O |

1. What type of office or hospital does your current pulmonologist work in?

|  | **[Randomize Rows]** | **[SELECT ONE]** |
| --- | --- | --- |
| **1.** | Expert IPF or interstitial lung disease (ILD) center of excellence (i.e., affiliated with a university) | O |
| **2** | Community private practice / doctors’ office | O |
| **3** | I am not sure **[ANCHOR]** | O |

| 1 | 2 | 3 | 4 | 5 | 6 | 7 |
| --- | --- | --- | --- | --- | --- | --- |

1. How satisfied were you with the communication and information about your IPF diagnosis from the healthcare provider (HCP) who diagnosed you? Click on the buttons below to rate from 1 to 7, with 1 being “Not at all satisfied” and 7 “Extremely Satisfied”.
2. What avenues of information were the most useful for discovering information about your IPF diagnosis? Please rank in order the following options .

If you are on a phone, please tap your selections in order. If you are on a computer, please click the button in the top right corner of your selections in order. To unselect an option, click or tap the option.

|  | **[Randomize Rows]** | **Rank Position** |
| --- | --- | --- |
| **1** | My diagnosing pulmonologist | ____ |
| **2** | My primary care provider | ____ |
| **3** | Nurses | ____ |
| **4** | IPF/PF support groups **(if selected write down names)** | ____ |
| **5** | The internet / Google | ____ |

19b. What IPF/PF support groups did you use for discovering information about your IPF diagnosis?

|  |  | **[SELECT ONE]** |
| --- | --- | --- |
| **1.** | Please specify | O |
| **2** | I am not sure **[ANCHOR]** | O |

1. Once you received your IPF diagnosis, how quickly did you share the information with others?

|  | **[Randomize Rows]** | **[SELECT ONE]** |
| --- | --- | --- |
| 1. | I shared it with my family right away, but I waited a while before sharing the news with others | O |
| 2 | I shared it with family and/or friends right away | O |
| 3 | I waited for a while before sharing it with my family and/or friends | O |
| 4 | I still haven’t shared the news with family and/or friends | O |

1. In terms of your overall health today, what other medical conditions do you have, if any? Reminder that all information provided here is confidential.

|  | **[Randomize Rows]** | **[SELECT ALL THAT APPLY]** |
| --- | --- | --- |
| **1** | Chronic obstructive pulmonary disease (COPD) / Emphysema | □ |
| **2** | Pulmonary Hypertension | □ |
| **3** | Pulmonary Infection | □ |
| **4** | Asthma | □ |
| **5** | Gastroesophageal reflux disease (GERD) / Acid reflux | □ |
| **6** | Cancer | □ |
| **7** | Obstructive sleep apnea (OSA) | □ |
| **8** | Diabetes | □ |
| **9** | Obesity | □ |
| **10** | Heart condition (congestive heart failure, high blood pressure, previous heart attack, etc.) | □ |
| **11** | Pulmonary embolism | □ |
| **12** | Anxiety / Depression | □ |
| **13** | None of the above **[EXCLUSIVE SELECTION]** | □ |

1. How many prescription medications do you take on a regular basis for all of your conditions? (Please consider all conditions, including your lung conditions/IPF)

|  | **[Randomize Rows]** | **SELECT ONE** |
| --- | --- | --- |
|  | 0-2 | O |
|  | 3-6 | O |
|  | 7-10 | O |
|  | More than 10 | O |

1. Did you ever receive a misdiagnosis for your IPF prior to being correctly diagnosed with IPF?

|  | [Randomize Rows] | **[SELECT ONE]** |
| --- | --- | --- |
| **1** | Yes | O |
| **2** | No | O |

1. **[SHOW IF Q21.r1 Q23.r1]** What were you misdiagnosed with?

|  | **[Randomize Rows]** | **[SELECT ALL THAT APPLY]** |
| --- | --- | --- |
| **1** | Asthma | □ |
| **2** | Chronic obstructive pulmonary disease (COPD) / Emphysema | □ |
| **3** | Pneumonia | □ |
| **4** | Bronchitis | □ |
| **5** | Interstitial lung disease (ILD) other than IPF | □ |
| **6** | Lung fibrosis due to a connective tissue disorder | □ |
| **8** | Other (please specify) | □ |

# Key Symptoms

1. Which symptoms associated with IPF have you experienced? Please select any symptoms that you think may be related to your IPF, even if you are not sure.

|  | **[Randomize Rows]** | **[SELECT ALL THAT APPLY]** |
| --- | --- | --- |
| **1** | Cough | □ |
| **2** | Shortness of breath / trouble breathing | □ |
| **3** | Chest pain | □ |
| **4** | Fatigue / tiredness | □ |
| **5** | Loss of appetite and/or weight loss | □ |
| **6** | Rounded and swollen fingertips / toes (clubbed fingers / toes) | □ |
| **7** | Aches in the muscles and joints | □ |
| **8** | Sleeping challenges | □ |
| **9** | Unintentional weight loss | □ |
| **10** | Other (please specify) | □ |

1. **[SHOW ONLY FOR Q25 SELECTED ANSWERS] [DISPLAY AS HORIZONTAL BUTTONS 1 THROUGH 7]** How burdensome are each of the following symptoms?

Click on the buttons below to rate each item from 1 to 7, with 1 being “Not burdensome at all” and 7 “Extremely burdensome”.

| 1 | 2 | 3 | 4 | 5 | 6 | 7 |
| --- | --- | --- | --- | --- | --- | --- |

1. For the following statements, please rate on a scale of 1 to 7 where 1 is “strongly disagree” and 7 is “strongly agree”

|  |  | **Strongly Disagree** |  |  |  |  |  | **Strongly Agree** | Not Applicable |
| --- | --- | --- | --- | --- | --- | --- | --- | --- | --- |
|  | **1** | **2** | **3** | **4** | **5** | **6** | **7** |  |
| 1 | I had to stop working earlier than I planned because of my IPF | q | q | q | q | q | q | q | q  Here |
| 2 | I can no longer travel because of my IPF | q | q | q | q | q | q | q |  |
| 3 | I am no longer able to do hobbies and activities I enjoy because of my IPF | q | q | q | q | q | q | q |  |
| 4 | I have trouble keeping up with my family, friends, children and/or grandchildren because of my IPF | q | q | q | q | q | q | q |  |
| 5 | I chose not to go to a major family event in the past 12 months because of my IPF | q | q | q | q | q | q | q | q  Here |
| 6 | My IPF has negatively impacted my relationships with my closest family and friends | q | q | q | q | q | q | q |  |
| 7 | My IPF has negatively impacted my independence | q | q | q | q | q | q | q |  |
| 8 | I struggle to complete basic housework tasks because of my IPF | q | q | q | q | q | q | q |  |
| 9 | My IPF has negatively impacted my relationships with my partner | q | q | q | q | q | q | q | q  Here |
| 10 | My IPF has impacted my basic personal hygiene (showering, brushing teeth) | q | q | q | q | q | q | q |  |

# Oxygen

1. Do you currently use supplemental oxygen?

|  |  | **[SELECT ONE]** |
| --- | --- | --- |
| **1** | Yes | O |
| **2** | No | O |

1. **[SHOW IF Q28.r1]** When do you typically use supplemental oxygen?

|  | **[Randomize Rows]** | **[SELECT ALL THAT APPLY]** |
| --- | --- | --- |
| **1** | At all times **[EXCLUSIVE SELECTION]** | □ |
| **2** | When I travel far away from home | □ |
| **3** | When I am exerting myself inside the house (taking the stairs, doing housework or chores) | □ |
| **4** | When I am exerting myself outside the house (taking walks, running errands, going to a restaurant) | □ |
| **5** | At night | □ |
| **6** | Other (please specify) | □ |

1. **[SHOW IF Q26.r1 Q28.r1]** For the following statements, please rate on a scale of 1 to 7 where 1 is “strongly disagree” and 7 is “strongly agree”

|  | **Strongly Disagree** |  |  |  |  |  | **Strongly Agree** |
| --- | --- | --- | --- | --- | --- | --- | --- |
| **1** | **2** | **3** | **4** | **5** | **6** | **7** |
| I can no longer participate in my hobbies and things I love because of my need for supplemental oxygen | q | q | q | q | q | q | q |
| I rarely leave my home because of my need for supplemental oxygen | q | q | q | q | q | q | q |
| I often struggle with accessing enough oxygen | q | q | q | q | q | q | q |
| I am embarrassed that I need to bring my oxygen with me when I leave my home | q | q | q | q | q | q | q |
| Oxygen helps improve my IPF symptoms a lot | q | q | q | q | q | q | q |

# Other Patient Journey

1. In the past 12 months, how many visits have you made to a doctor because of your IPF?

|  | Clinic standard doctors appointments | ___ # **[FORCE 1-2 NUMBERS: 0-99]** |
| --- | --- | --- |
|  | Inpatient hospital visit, e.g., emergency room, urgent care | ___ # **[FORCE 1-2 NUMBERS: 0-99]** |

1. How long does it take you to travel to medical care? [PARTICIPANT CAN FILL OUT EITHER ONE OR BOTH OPTIONS]

|  | Primary care provider | ___ # hours  [RANGE NUMBERS: 0-24] | ___ # minutes  [RANGE NUMBERS: 0-59] |
| --- | --- | --- | --- |
|  | Current pulmonologist | ___ # hours  [RANGE NUMBERS: 0-24] | ___ # minutes  [RANGE NUMBERS: 0-59] |
|  | The closest hospital | ___ # hours  [RANGE NUMBERS: 0-24] | ___ # minutes  [RANGE NUMBERS: 0-59] |

1. How challenging is it to make an appointment and see your pulmonologist when you need to?

Click on the buttons below to rate this from 1 to 7, with 1 being “Not challenging at all” and 7 “Extremely challenging”.

| 1 | 2 | 3 | 4 | 5 | 6 | 7 |
| --- | --- | --- | --- | --- | --- | --- |

33b. How long did it take does it typically take to get an appointment with your pulmonologist when you made your first appointment with them need to?

|  |  | ALLOW RESPONDENT TO FILL OUT ONE  r1 or r2 only not both |
| --- | --- | --- |
|  | ___ weeks [1 NUMBER: 0-4] | O |
|  | ___ months [1-2 NUMBERS: 0-99] | O |
|  | Do not remember | O |

# IPF Management and Treatment

1. Since you were diagnosed, what things have you done to manage your IPF and your symptoms? i.e., in the past or today

|  | [Randomize Rows] | **[SELECT ALL THAT APPLY]** |
| --- | --- | --- |
| **1** | Going to pulmonary rehab | □ |
| **2** | Using supplemental oxygen therapy | □ |
| **3** | Taking an antifibrotic medication: Esbriet (pirfenidone) or generic pirfenidone [FORCE SELECTION IF S3.r1, DO NOT SHOW SELECTION IF S3.r1 NOT SELECTED] | □ |
| **4** | Taking an antifibrotic medication: Ofev (nintedanib) [FORCE SELECTION IF S3.r2, DO NOT SHOW SELECTION IF S3.r2 NOT SELECTED] | □ |
| **5** | Exercising | □ |
| **6** | Taking steroids (i.e., prednisone) | □ |
| 7 | Taking other medications (please specify) | □ |
| **8** | None | □ |

1. **[SHOW FOR Q34 SELECTIONS] [DISPLAY AS HORIZONTAL BUTTONS 1 THROUGH 7]** What is your overall level of satisfaction of each treatment/strategy?

Click on the buttons below to rate each item from 1 to 7, with 1 being “Not at all satisfied” and 7 “Extremely satisfied”

| **[SHOW FOR Q34 SELECTIONS]** | **Not at all satisfied** |  |  |  |  |  | **Extremely satisfied** |
| --- | --- | --- | --- | --- | --- | --- | --- |
| **1** | **2** | **3** | **4** | **5** | **6** | **7** |
| Going to pulmonary rehab | q | q | q | q | q | q | q |
| Using supplemental oxygen therapy | q | q | q | q | q | q | q |
| Taking an antifibrotic medication: Esbriet (pirfenidone) or generic pirfenidone | q | q | q | q | q | q | q |
| Taking an antifibrotic medication: Ofev (nintedanib) | q | q | q | q | q | q | q |
| Exercising | q | q | q | q | q | q | q |
| Steroids (i.e., prednisone) | q | q | q | q | q | q | q |
| Other medications | q | q | q | q | q | q | q |

1. **[SHOW ONLY IF Q34.r3 AND Q34.r4]** Which antifibrotic agent did you try first?

|  |  | **SELECT ONE** |
| --- | --- | --- |
|  | Esbriet (pirfenidone) or generic pirfenidone | O |
|  | Ofev (nintedanib) | O |

**IF Q36.r1 SELECTED SHOW Q34.r3 QUESTIONS FIRST, IF Q36.r2 SELECTED, SHOW Q34.r4 QUESTIONS FIRST**

1. How did you initially learn about the antifibrotic medications Esbriet (pirfenidone) and Ofev (nintedanib)?

|  | **[Randomize Rows]** | Esbriet (pirfenidone) or generic pirfenidone | Ofev (nintedanib) |
| --- | --- | --- | --- |
| **1** | My doctor informed me | O | O |
| **2** | I discovered it from my own research | O | O |
| **3** | A family member or friend discovered it and informed me about it | O | O |
| **4** | I heard about it from another person with IPF / support group | O | O |
| **5** | I am not aware of this medication | O | O |

1. How did your doctor talk to you about treatment options for IPF?

|  | **[Randomize Rows]** | **SELECT ONE** |
| --- | --- | --- |
| **1** | My doctor mentioned there were two treatment options, Esbriet/pirfenidone and Ofev | O |
| **2** | My doctor mentioned just one option | O |
| **3** | My doctor never talked to me about the anti-fibrotic treatments options | O |

1. [SHOW IF Q38.r1] [SHOW IF Q34.r3 AND/OR Q34.r4] Who made the decision of which antifibrotic treatment option to start with (Esbriet/pirfenidone or Ofev/nintedanib)?

|  | **[Randomize Rows]** | **[SELECT ONE]** |
| --- | --- | --- |
| **1** | My doctor made the decision | O |
| **2** | My doctor and I made the decision together | O |
| **3** | My doctor did not share a strong opinion and allowed me to make the decision | O |

1. **[SHOW ONLY IF Q38.r1]** Why was the decision made to start with **[INSERT Q34 SELECTION: EITHER Q34.r3 OR Q34.r4; IF** **Q34.r3 AND Q34.r4 SELECTED INSERT Q36]** and not the other antifibrotic treatment option?

|  | **[Randomize Rows]** | **SHOW ONLY IF Q34.r3; IF Q34.r3 & Q34.r4 SELECTED; SHOW ONLY IF Q36.r1**  **[SELECT ALL THAT APPLY]**  Esbriet | **SHOW ONLY IF Q34.r4; IF Q34.r3 & Q34.r4 SELECTED; SHOW ONLY IF Q36.r2**  **[SELECT ALL THAT APPLY]**  Ofev |
| --- | --- | --- | --- |
| **1** | It was because of how effective the treatment is | □ | □ |
| **2** | It had to do with side effects: nausea, vomiting, loss of appetite | □ | □ |
| **3** | It had to do with side effects: diarrhea | □ | □ |
| **4** | It had to do with side effects: photosensitivity and rash | □ | □ |
| **5** | It had to do with other side effects Another reason (please specify) | □ | □ |
| **6** | It had to do with dosing and managing the medication logistics | □ | □ |
| **7** | Because of cost/out of pocket expense and/or insurance coverage | □ | □ |

1. **[SHOW ONLY IF Q38.2]** What topics did you discuss with your doctor about the antifibrotic treatment options (Esbriet/pirfenidone and/or Ofev/nintedanib)?

|  | **[Randomize Rows]** | **SHOW ONLY IF Q34.r3**  **[SELECT ALL THAT APPLY]**  Esbriet | **SHOW ONLY IF Q34.r4**  **[SELECT ALL THAT APPLY]**  Ofev |
| --- | --- | --- | --- |
| **1** | How effective the treatment is | □ | □ |
| **2** | Side effects: nausea, vomiting, loss of appetite | □ | □ |
| **3** | Side effects: diarrhea | □ | □ |
| **4** | Side effects: photosensitivity and rash | □ | Do not allow selection for Ofev. Do not show Q34.r4 only selected. |
| **5** | It had to do with other side effects Another reason (please specify) | □ | □ |
| **6** | Dosing and logistics of managing medication | □ | □ |
| **7** | Cost/out of pocket expense and insurance coverage | □ | □ |

1. **[SHOW ONLY IF Q34.r3 AND/OR Q34.r4]** Did you feel confident in understanding treatment options including dosing and side effects prior to starting therapy?
2. Click on the buttons below to rate this from 1 to 7, with 1 being “Not at all confident” and 7 “Extremely confident”.

| 1 | 2 | 3 | 4 | 5 | 6 | 7 |
| --- | --- | --- | --- | --- | --- | --- |

1. [SHOW ONLY IF Q34.r3 AND/OR Q34.r4] How did your doctor initially discuss timing of starting antifibrotic treatments with you (Esbriet/pirfenidone or Ofev/nintedanib)? ≤

|  | **[Randomize Rows]** | **SHOW ONLY IF Q34.r3 IF Q34.r3 & Q34.r4 SELECTED; SHOW ONLY IF Q36.r1**  **[SELECT ONE]**  Esbriet | **SHOW ONLY IF Q34.r4 IF Q34.r3 & Q34.r4 SELECTED; SHOW ONLY IF Q36.r2**  **[SELECT ONE]**  Ofev |
| --- | --- | --- | --- |
| **1** | My doctor wanted to start treatment right away | O | O |
| **2** | My doctor wanted to wait to start treatment | O | O |
| **3** | My doctor did not share a strong opinion about when to start treatment and allowed me to make the decision | O | O |

1. [SHOW ONLY IF Q34.r3 AND/OR Q34.r4] How did you feel about timing of starting treatment with antifibrotics (Esbriet/pirfenidone or Ofev/nintedanib)?

|  | **[Randomize Rows]** | **SHOW ONLY IF Q34.r3 IF Q34.r3 & Q34.r4 SELECTED; SHOW ONLY IF Q36.r1**  **[SELECT ONE]**  Esbriet | **SHOW ONLY IF Q34.r4 IF Q34.r3 & Q34.r4 SELECTED; SHOW ONLY IF Q36.r2**  **[SELECT ONE]**  Ofev |
| --- | --- | --- | --- |
| **1** | I wanted to start treatment right away | O | O |
| **2** | I did not want to start treatment right away | O | O |

1. **[**SHOW ONLY IF Q44.r2] Why did your doctor want to wait to start antifibrotic treatment (Esbriet/pirfenidone or Ofev/nintedanib)?

|  | **[Randomize Rows]** | **SHOW ONLY IF Q34.r3.**  **IF Q34.r3 & Q34.r4 SELECTED; SHOW ONLY IF Q36.r1**  **[SELECT ALL THAT APPLY]**  Esbriet | **SHOW ONLY IF Q34.r4.**  **IF Q34.r3 & Q34.r4 SELECTED; SHOW ONLY IF Q36.r2**  **[SELECT ALL THAT APPLY]**  Ofev |
| --- | --- | --- | --- |
| **1** | They wanted to wait until my symptoms worsened | □ | □ |
| **2** | It had to do with side effects: nausea, vomiting, loss of appetite | □ | □ |
| **3** | It had to do with side effects: diarrhea | □ | □ |
| **4** | It had to do with side effects: photosensitivity and rash | □ | Do not allow selection for Ofev. Do not show Q34.r4 only selected. |
| **5** | It had to do with other side effects Another reason (please specify) | □ | □ |
| **6** | Potential challenges with cost and insurance coverage | □ | □ |
| **7** | Impact on my quality of life | □ | □ |
| **8** | The effectiveness of the treatment | □ | □ |
| **9** | Logistics of managing the medication and doses | □ | □ |

1. **[SHOW IF Q34.r3 AND/OR Q34.r4]** What avenues of information were the most useful for discovering information about your IPF treatment options? Please rank in order the following options.

If you are on a phone, please tap your selections in order. If you are on a computer, please click the button in the top right corner of your selections in order. To unselect an option, click or tap the option. You must edit the “other” box to move it.

|  | **[Randomize Rows]** | **Rank Position** |
| --- | --- | --- |
| **1** | My diagnosing pulmonologist | ____ |
| **2** | My primary care provider | ____ |
| **3** | Nurses | ____ |
| **4** | IPF/PF support groups (if selected write down names) | ____ |
| **5** | The internet / Google | ____ |
| **6** | [SHOW ONLY IF Q34.r3 OR Q34.r4] The manufacturer of Esbriet and Ofev | ____ |
| 7 | Other (please specify) | ____ |

47b. What IPF/PF support groups did you use for discovering information about your IPF diagnosis?

|  |  | **[SELECT ONE]** |
| --- | --- | --- |
| **1.** | Please specify | O |
| **2** | I am not sure **[ANCHOR]** | O |

1. **[SHOW ONLY IF Q34.r3]** What side effects have you experienced with Esbriet (pirfenidone) or generic pirfenidone?

|  | **[Randomize Rows]** | **[SELECT ALL THAT APPLY]** |
| --- | --- | --- |
| **1** | Nausea | □ |
| **2** | Rash / Sensitivity to sunlight | □ |
| **3** | Stomach pain / discomfort | □ |
| **4** | Diarrhea | □ |
| **5** | Fatigue | □ |
| **6** | Vomiting | □ |
| **7** | Loss of appetite / inability to eat | □ |
| **8** | Lightheadedness | □ |
| **9** | Liver test problems | □ |
| **10** | Weight loss | □ |
| **11** | No side effects **[EXCLUSIVE]** **[ANCHOR]** | □ |

1. **[SHOW ONLY FOR Q48 SELECTED ANSWERS] [DISPLAY AS HORIZONTAL BUTTONS 1 THROUGH 7]** How burdensome are each of the following side effects?

Click on the buttons below to rate each item from 1 to 7, with 1 being “Not burdensome at all” and 7 “Extremely burdensome”.

| 1 | 2 | 3 | 4 | 5 | 6 | 7 |
| --- | --- | --- | --- | --- | --- | --- |

1. **[SHOW ONLY IF Q34.r4]** What side effects have you experienced with Ofev (nintedanib)?

|  | **[Randomize Rows]** | **[SELECT ALL THAT APPLY]** |
| --- | --- | --- |
| **1** | Diarrhea | □ |
| **2** | Nausea | □ |
| **3** | Stomach pain / discomfort | □ |
| **4** | Liver test problems | □ |
| **5** | Vomiting | □ |
| **6** | Loss of appetite / inability to eat | □ |
| **7** | Fatigue | □ |
| **8** | Lightheadedness | □ |
| **9** | Weight loss | □ |
| **10** | No side effects **[EXCLUSIVE]** **[ANCHOR]** | □ |

1. **[SHOW ONLY FOR Q50 SELECTED ANSWERS] [DISPLAY AS HORIZONTAL BUTTONS 1 THROUGH 7]** How burdensome are each of the following side effects?

Click on the buttons below to rate each item from 1 to 7, with 1 being “Not burdensome at all” and 7 “Extremely burdensome”.

| 1 | 2 | 3 | 4 | 5 | 6 | 7 |
| --- | --- | --- | --- | --- | --- | --- |

1. Has your weight changed at all during the course of your IPF disease?

| **1** | Yes, weight gained | ___ pounds **[FORCE NUMBERS: 0-999]** |
| --- | --- | --- |
| **2** | Yes, weight lost | ___ pounds [**FORCE NUMBERS: 0-999]** |
| **3** | No change in weight | O |

1. **[SHOW ONLY IF Q34.r4 AND/OR Q34.r3]** Have you ever stopped, paused, or taken a lower dose of your antifibrotic medication than the full dose? *(801 mg - usually 3 pills 3 times a day for Esbriet/pirfenidone) (150 mg – one pill twice a day for Ofev/nintedanib)*

|  | **[RANDOMIZE ROWS]** | **[SHOW COLUMN IF Q34.r3] SELECT ALL THAT APPLY**  Esbriet (pirfenidone) or generic pirfenidone | **[SHOW COLUMN IF Q34.r4] SELECT ALL THAT APPLY**  Ofev (nintedanib) |
| --- | --- | --- | --- |
| **1** | I occasionally skip a dose or pill(s) or have in the past | □ | □ |
| **2** | I have consistently taken a lower dose / fewer pills of my antifibrotic than the full dose | □ | □ |
| **3** | I have paused my antifibrotic for a period of time before restarting | □ | □ |
| **4** | I stopped my antifibrotic and have not started taking it again | □  **[DO NOT SHOW IF Q36.r1]** | □  **[DO NOT SHOW IF Q36.r2]** |
| **5** | **[SHOW ONLY IF Q34.r3 AND Q34.r4]** I stopped taking **[INSERT Q36]** andswitched to the other antifibrotic | **[SHOW AS ONE SELECTION]**  □ | |
| **6** | I have never stopped, paused, or taken fewer doses of my antifibrotic medication **[ANCHOR] [EXCLUSIVE]** | □ | □ |

1. **[SHOW ONLY IF Q53.r4 AND/OR Q53.r3]** How many times a year do have you done this?

|  |  | **[SHOW COLUMN IF Q34.r3]**  Esbriet (pirfenidone) or generic pirfenidone | **[SHOW COLUMN IF Q34.r4]**  Ofev (nintedanib) |
| --- | --- | --- | --- |
| 1 | [SHOW ONLY IF Q53.r2 any col] I have consistently taken a lower dose / fewer pills of my antifibrotic than the full dose | ___ Times per year [FORCE NUMBERS:0-999]  [SHOW ONLY IF Q53. r2 Esbriet SELECTED] | ___ Times per year [FORCE NUMBERS:0-999]  [SHOW ONLY IF Q53. r2 Ofev SELLECTED] |
| **2** | **[SHOW ONLY IF Q53.r3 any col]** I have paused my antifibrotic for a period of time before restarting | ___ Times per year **[FORCE NUMBERS:0-999]**  **[SHOW ONLY IF Q53.r43Esbriet SELLECTED]** | ___ Times per year **[FORCE NUMBERS:0-999]**  **[SHOW ONLY IF Q53.r3 Ofev SELLECTED]** |

1. **SHOW ONLY IF Q34.r3 AND Q34.r4** Why did you stop taking **[INSERT Q36]** andswitched to the other anti-fibrotic?

|  | **SELECT ALL THAT APPLY**  **[RANDOMIZE ROWS]** | **SELECT ALL THAT APPLY** |
| --- | --- | --- |
| **1** | Did not think the medication was working | □ |
| **2** | My lung function declined / tests showed progression of IPF | □ |
| **3** | It had to do with side effects: nausea, vomiting, loss of appetite | □ |
| **4** | It had to do with side effects: diarrhea | □ |
| **5** | It had to do with side effects: photosensitivity and rash  Do not show if Q36.r2 selected. | □ |
| **6** | It had to do with other side effects Another reason (please specify) | □ |
| **7** | Cost | □ |
| **8** | Logistics of managing the medication / I forgot | □ |

1. **[SHOW IF Q34.r3] [SHOW COLUMNS ONLY FOR Q53 SELECTED ANSWERS, DO NOT SHOW Q53.r5 COLUMN, SKIP IF Q53.r6 SELECTED]** Why did you stop, pause, or take fewer doses of your antifibrotic Esbriet/pirfenidone? Select the reason for each situation.

|  | **SELECT ALL THAT APPLY**  **[RANDOMIZE COLUMNS AND ROWS]** | I have consistently taken or am taking a lower dose of my antifibrotic than prescribed | I occasionally skip a dose or pill(s) or have in the past | I have paused my antifibrotic for a period of time before restarting | I stopped my antifibrotic and did not restart |
| --- | --- | --- | --- | --- | --- |
| **1** | Did not think the medication was working | □ | □ | □ | □ |
| **2** | My lung function declined / tests showed progression of IPF | □ | □ | □ | □ |
| **3** | It had to do with side effects: nausea, vomiting, loss of appetite | □ | □ | □ | □ |
| **4** | It had to do with side effects: diarrhea | □ | □ | □ | □ |
| **5** | It had to do with side effects: photosensitivity and rash | □ | □ | □ | □ |
| **6** | It had to do with other side effects Another reason (please specify) | □ | □ | □ | □ |
| **7** | Cost | □ | □ | □ | □ |
| **8** | Logistics of managing the medication / I forgot | □ | □ | □ | □ |
| **9** | Refills were delayed | □ | □ | □ | □ |

1. **[SHOW IF Q34.r4] [SHOW COLUMNS ONLY FOR Q53 SELECTED ANSWERS, DO NOT SHOW Q53.r5 COLUMN, SKIP IF Q53.r5 r6 SELECTED]** Why did you stop, pause, or take fewer doses of your antifibrotic Ofev (nintedanib)? Select the reason for each situation.

|  | **SELECT ALL THAT APPLY**  **[RANDOMIZE COLUMNS AND ROWS]** | I have consistently taken or am taking a lower dose of my antifibrotic than prescribed | I occasionally skip a dose or pill(s) | I have paused my antifibrotic for a period of time before restarting | I stopped my antifibrotic and did not restart |
| --- | --- | --- | --- | --- | --- |
| **1** | Did not think the medication was working | □ | □ | □ | □ |
| **2** | My lung function declined / tests showed progression of IPF | □ | □ | □ | □ |
| **3** | It had to do with side effects: nausea, vomiting, loss of appetite | □ | □ | □ | □ |
| **4** | It had to do with side effects: diarrhea | □ | □ | □ | □ |
| **5** | It had to do with side effects: photosensitivity and rash | □ | □ | □ | □ |
| **6** | It had to do with other side effects Another reason (please specify) | □ | □ | □ | □ |
| **7** | Cost | □ | □ | □ | □ |
| **8** | Logistics of managing the medication / I forgot | □ | □ | □ | □ |
| **9** | Refills were delayed | □ | □ | □ | □ |

1. **[SHOW ONLY IF Q34.r3 AND Q34.r4]** Whose decision was it to stop taking **[INSERT Q36]** and switched to the other anti-fibrotic?

|  | **SELECT ONE [RANDOMIZE COLUMNS AND ROWS]** | **SELECT ONE** |
| --- | --- | --- |
| **1** | It was my doctor’s decision / recommendation | O |
| **2** | It was my decision / preference | O |
| **3** | It was a combined decision between me and my doctor | O |

1. **[SHOW IF Q34.r3] [SHOW COLUMNS ONLY FOR Q53 SELECTED ANSWERS, DO NOT SHOW Q53.r5 COLUMN, SKIP IF Q53.r6 SELECTED]** Whose decision was it to stop, pause or take fewer doses of your antifibrotic Esbriet/pirfenidone?

|  | **SELECT ONE**  **[RANDOMIZE COLUMNS AND ROWS]** | I have consistently taken or am taking a lower dose of my antifibrotic than prescribed | I occasionally skip a dose or pill(s) | I have paused my antifibrotic for a period of time before restarting | I stopped my antifibrotic and did not restart |
| --- | --- | --- | --- | --- | --- |
| **1** | It was my doctor’s decision / recommendation | O | O | O | O |
| **2** | It was my decision / preference | O | O | O | O |
| **3** | It was a combined decision between me and my doctor | O | O | O | O |

1. **[SHOW IF Q34.r4] [SHOW COLUMNS ONLY FOR Q53 SELECTED ANSWERS, DO NOT SHOW Q53.r5 COLUMN, SKIP IF Q53.r6 SELECTED]** Whose decision was it to stop, pause or take fewer doses of your antifibrotic Ofev (nintedanib)?

|  | **SELECT ONE**  **[RANDOMIZE COLUMNS AND ROWS]** | I have consistently taken or am taking a lower dose of my antifibrotic than prescribed | I occasionally skip a dose or pill(s) | I have paused my antifibrotic for a period of time before restarting | I stopped my antifibrotic and did not restart |
| --- | --- | --- | --- | --- | --- |
| **1** | It was my doctor’s decision / recommendation | O | O | O | O |
| **2** | It was my decision / preference | O | O | O | O |
| **3** | It was a combined decision between me and my doctor | O | O | O | O |

1. **[SHOW ONLY IF Q34.r3]** For the following statements, please rate on a scale of 1 to 7 where 1 is “strongly disagree” and 7 is “strongly agree” If you are not sure, please answer to the best of your abilities.

|  | **Strongly Disagree** |  |  |  |  |  | **Strongly Agree** |
| --- | --- | --- | --- | --- | --- | --- | --- |
| **1** | **2** | **3** | **4** | **5** | **6** | **7** |
| Esbriet gives me hope | q | q | q | q | q | q | q |
| Esbriet is slowing the progression of my IPF | q | q | q | q | q | q | q |
| The benefits of Esbriet outweigh the side effects | q | q | q | q | q | q | q |
| The side effects of Esbriet significantly impact my quality of life | q | q | q | q | q | q | q |
| I struggle to manage the side effects | q | q | q | q | q | q | q |
| I have to force myself to eat when I am not hungry to help with the side effects | q | q | q | q | q | q | q |
| Esbriet’s side effects prevent me from leaving the house | q | q | q | q | q | q | q |
| Sometimes I skip a dose of Esbriet to avoid side effects | q | q | q | q | q | q | q |

1. **[SHOW ONLY IF Q34.r4]** For the following statements, please rate on a scale of 1 to 7 where 1 is “strongly disagree” and 7 is “strongly agree” If you are not sure, please answer to the best of your abilities.

|  | **Strongly Disagree** |  |  |  |  |  | **Strongly Agree** |
| --- | --- | --- | --- | --- | --- | --- | --- |
| **1** | **2** | **3** | **4** | **5** | **6** | **7** |
| Ofev gives me hope | q | q | q | q | q | q | q |
| Ofev is slowing the progression of my IPF | q | q | q | q | q | q | q |
| The benefits of Ofev outweigh the side effects | q | q | q | q | q | q | q |
| The side effects of Ofev significantly impact my quality of life | q | q | q | q | q | q | q |
| I struggle to manage the side effects | q | q | q | q | q | q | q |
| I have to force myself to eat when I am not hungry to help with the side effects | q | q | q | q | q | q | q |
| Ofev’s side effects prevent me from leaving the house | q | q | q | q | q | q | q |
| Sometimes I skip a dose of Ofev to avoid side effects | q | q | q | q | q | q | q |

62b. [SHOW ONLY IF Q34.r3 AND/OR Q34.r4] Are you currently taking Esbriet / pirfenidone and/or Ofev?

|  |  | **SELECT ONE** |
| --- | --- | --- |
|  | **Yes I am still taking Esbriet / pirfenidone** | **O** |
|  | **Yes I am still taking Ofev (nintedanib)** | **O** |
|  | **I am not currently taking either antifibrotic** | **O** |

1. **[SHOW ONLY IF Q34.r3 AND/OR Q34.r4]** How much money do you currently spend on healthcare / out of pocket (OOP) costs per month?

|  | Total monthly healthcare / OOP cost (both IPF costs and costs associated with other conditions / diseases) | **___ [FORCE NUMBERS: 0-999,999] [NUMBER NEEDS TO BE ≥ Q63.r2 + Q63.r3 + Q63.r4]** |
| --- | --- | --- |
|  | **SHOW ONLY IF** Q62b.r1Monthly cost for Esbriet/pirfenidone | ___ **[FORCE NUMBERS: 0-999,999]** |
|  | **SHOW ONLY IF** Q62b.r2Monthly cost for Ofev (nintedanib) | ___ **[FORCE NUMBERS: 0-999,999]** |
|  | Monthly cost on other IPF treatments (oxygen, pulmonary rehab, other IPF treatments) | ___ **[FORCE NUMBERS: 0-999,999]** |

1. **[SHOW ONLY IF Q34.r3 AND/OR Q34.r4 NOT SELECTED]** How much money do you currently spend on healthcare / out of pocket (OOP) costs per month?

|  | Total monthly healthcare / OOP cost (both IPF costs and costs associated with other conditions / diseases) | ___ **[FORCE NUMBERS: 0-999,999] [NUMBER NEEDS TO BE ≥ Q63.r42]** |
| --- | --- | --- |
|  | Monthly cost on IPF treatments (oxygen, pulmonary rehab, other IPF treatments) | ___ **[FORCE NUMBERS: 0-999,999]** |

1. Do you feel your financial resources limit your ability to access the care and treatments you need / want for your IPF?

|  | [Randomize Rows] | **[SELECT ONE]** |
| --- | --- | --- |
| **1** | Yes | O |
| **2** | No | O |

1. **[SHOW ONLY IF Q34.r3 AND/OR Q34.r4 NOT SELECTED]** Whose decision was it to not start antifibrotic medication?

|  | **[Randomize Rows]** | **[SELECT ONE]** |
| --- | --- | --- |
| **1** | It was my doctor’s decision / recommendation | O |
| **2** | It was my decision / preference | O |
| **3** | It was a combined decision between me and my doctor | O |

1. **[SHOW ONLY IF Q34.r3 AND/OR Q34.r4 NOT SELECTED]** What are the reasons that you have not started an antifibrotic medication?

|  | **[Randomize Rows]** | **[SELECT ALL THAT APPLY]** |
| --- | --- | --- |
| **1** | It was because of how effective the treatment is | □ |
| **2** | It had to do with side effects: nausea, vomiting, loss of appetite | □ |
| **3** | It had to do with side effects: diarrhea | □ |
| **4** | It had to do with side effects: photosensitivity and rash | □ |
| **5** | It had to do with other side effects (please specify) | □ |
| **6** | Because of cost/out of pocket expense and/or insurance coverage | □ |
| **7** | Managing the medication logistics and dosing will be challenging | □ |
| **8** | I am waiting to start treatment until symptoms worsen | □ |
| **9** | I was told my IPF was too advanced to start an antifibrotic | □ |
| **10** | Other (please specify) **[ANCHOR]** | □ |

1. **[SHOW ONLY IF Q34.r3 AND/OR Q34.r4 NOT SELECTED]** Rank the reasons that you have not started an antifibrotic medication?

If you are on a phone, please tap your selections in order. If you are on a computer, please click the button in the top right corner of your selections in order. To unselect an option, click or tap the option.

|  | **[SHOW IF SELECTED IN Q54 Q67] [Randomize Rows]** | **Rank Position** |
| --- | --- | --- |
| **1** | It was because of how effective the treatment is | ____ |
| **2** | It had to do with side effects: nausea, vomiting, loss of appetite | ____ |
| **3** | It had to do with side effects: diarrhea | ____ |
| **4** | It had to do with side effects: photosensitivity and rash | ____ |
| **5** | It had to do with other side effects (please specify) | ____ |
| **6** | Because of cost/out of pocket expense and/or insurance coverage | ____ |
| **7** | Managing the medication logistics and dosing will be challenging | ____ |
| **8** | I am waiting to start treatment until symptoms worsen | ____ |
| **9** | I was told my IPF was too advanced to start an antifibrotic | ____ |
| **10** | **[PIPE FROM Q67.r10]** | **_____** |

1. If you could have a new IPF treatment that was better than what is available today, what would be most important to you?

If you are on a phone, please tap your selections in order. If you are on a computer, please click the button in the top right corner of your selections in order. To unselect an option, click or tap the option. You must edit the “other” box to move it.

|  | **[Randomize Rows]** | **Rank Position** |
| --- | --- | --- |
| **1** | Stabilizing my disease progression | ____ |
| **2** | Improving my lung function | ____ |
| **3** | Minimal diarrhea | ____ |
| **4** | Minimal nausea / vomiting / impact on appetite |  |
| **5** | Minimal photosensitivity and rash |  |
| **4** | No lifestyle modification needed (e.g., no need to eat protein around dosing) | ____ |
| **5** | No out of pocket costs for treatment | ____ |
| **6** | Other (please specify) | ____ |

69b. Please rate the following statements on a scale 1 is “strongly disagree” and 7 is “strongly agree”

|  | Strongly Disagree |  |  |  |  |  | Strongly Agree |
| --- | --- | --- | --- | --- | --- | --- | --- |
|  | 1 | 2 | 3 | 4 | 5 | 6 | 7 |
| If there was a new IPF medication with improved gastrointestinal side effects (nausea, diarrhea, vomiting, loss of appetite, stomach pain), I would ask my doctor about it | q | q | q | q | q | q | q |
| If there was a new IPF medication with improved gastrointestinal side effects (nausea, diarrhea, vomiting, loss of appetite, stomach pain), I would want to go on that medication | q | q | q | q | q | q | q |
| If there was a new IPF medication with improved gastrointestinal side effects (nausea, diarrhea, vomiting, loss of appetite, stomach pain), this would help me and others with IPF stay on treatment longer | q | q | q | q | q | q | q |

1. Have you ever participated in a clinical trial of a new drug?

|  | [Randomize Rows] | **[SELECT ONE]** |
| --- | --- | --- |
|  | Yes | O |
|  | No | O |

1. Are you or were you ever a smoker?

|  | **[Randomize Rows]** | **[SELECT ONE]** |
| --- | --- | --- |
|  | Current Smoker | O |
|  | Previous Smoker | O |
|  | Never been a smoker | O |

1. Would you be willing to like to provide verification of your idiopathic pulmonary fibrosis (IPF) diagnosis for an additional honorarium of $10? We are looking for this information from survey respondents to help us better interpret responses in the survey.

Please attach an image or screenshot of that mentions your diagnosis of IPF, such as a page from your patient portal, an image of a radiology report or an image of your IPF treatment prescription/bottle (Esbriet/pirfenidone or Ofev/nintedanib). that includes your diagnosis of IPF.

Please exclude or cross out any personal information from your image or screenshot picture.

Additionally, all personal identifying information will be kept private and not seen by or shared with anyone else.

- **Instructions:** On yourphone or computer please type into google or another search website “how to take a screenshot on my phone or on my computer” depending on which device you are using.
- **On a computer:** To take a screenshot / picture you can select the window key and print screen key
- **On a phone:**  To take a screenshot / picture you can press the power button and volume up key

|  |  | **[SELECT ONE]** |
| --- | --- | --- |
|  | Yes **[INSERT IMAGE]** | O |
|  | No | O |

Thank you very much for your participation! This information will be used to help understand challenges faced by people living with IPF so we can better meet their needs. You will receive your $40 amazon gift code incentive via email.
