# Supplementary material for: Perspectives of People Living with Idiopathic Pulmonary Fibrosis: A Qualitative and Quantitative Study
Source: Research Square preprint supplement (doi:10.21203/rs.3.rs-6190511/v1), 2025-04-02
Supplement: Supplementary file 2 [file 895c137229e5284ff432168b.docx]

**IPF Patient Discussion Guide**

***Greyed out text should be deprioritized unless there is extra time***

**Introduction**

- My name is _____, I represent a company in the biotechnology industry looking to learn more about you and your journey as someone with idiopathic pulmonary fibrosis or IPF.
- The goal of our conversation is to understand your experiences throughout your diagnosis and starting treatment as well as get your thoughts on a hypothetical new product for IPF.
- **It is especially important for us to respect your privacy. During this interview we ask that you use your first name only and not mention pieces of information like your last name, the name of your doctor or hospital you go to.**
- Would you be OK if I record our conversation for note-taking purposes only?

# PART 1

**Interviewee Background**

1. Can you provide a quick introduction of yourself?
   1. Family
   2. Education level
   3. Hobbies / Occupation
   4. Where they live (urban, rural)

**Presentation, Diagnosis, and Follow-Up**

1. [Present to MD] How long was it between when you first started having symptoms and you talked to a doctor, nurse, or other medical professional?
   1. What were the initial symptoms that made you seek medical care?
   2. Which type of medical professional? (e.g., PCP, pulmonologist, nurse)
   3. Why did you decide to bring your symptoms up to the [medical professional] at that point?
2. [Initial visit] What did the initial visit with the [medical professional] look like?
   1. What did the conversation look like?
   2. What, if any, tests were done?
   3. What was the conclusion/next steps from this initial office visit?
3. [Referrals] Who ultimately diagnosed you with IPF?  *Ask for specialty: Pulmonologist, Primary Care Doctor, Other?*
   1. [If different than first medical professional]
      1. How did you get connected with the doctor who diagnosed you?
      2. How long did you wait for this appointment?
      3. Was this a center that specializes in IPF and interstitial lung disease (same as pulmonary fibrosis) or a university center or a pulmonologist in your community?
      4. Between [first medical professional] and the doctor who ultimately diagnosed you, did you see any other medical professionals?
         1. Which ones? Over what timeframe?

1. [Diagnosis] How did your doctor diagnose you with IPF?
   1. What tests were performed? *Probe on breathing test, CT scan of your chest, pulmonary function testing, autoimmune blood work, echo test, bronchoscopy, and surgical biopsy?*
      1. Capture when the patients do not know
   2. How long was it between your first symptoms and your official diagnosis?
   3. How long was it between your first conversation with a medical professional and official diagnosis?
   4. How many visits did you have to see a doctor before you were diagnosed?
   5. Were you ever diagnosed with another lung condition prior to being diagnosed with IPF?
   6. Did you know anyone else with this diagnosis? Did anyone in your family have this?
   7. Were you put on other medications / treatments for your lung condition prior to your diagnosis? What were those treatments?
2. ***Moderator to confirm patient journey timeline by pulling in inputs from earlier if initial answers were unclear***
   1. Time from symptoms to presenting to first HCP
   2. Time from first HCP to diagnosing HCP
   3. Time from first meeting with diagnosing HCP to actual diagnosis
3. [Patient knowledge] What did their doctor tell you about this condition?
   1. How much time did the physician spend with you to discuss the diagnosis and options?
      1. Did you understand your diagnosis and the results of your testing?
   2. Did you ask questions? If so, did you feel like your questions were answered?
   3. Did you receive any resources from your physician after receiving your diagnosis? *Probe: brochures, websites*
   4. What did you do after you were diagnosed with IPF? (e.g., research the disease, join patient support group)
   5. Did you bring a family member or friend with you, and did they help you understand what you were being told?
   6. If you received a website with information, did you access it or did anyone help you access it?
4. [Monitoring] Since diagnosis, how frequently do you see your pulmonologist?
   1. How far do you have to travel to see them?
   2. Who is involved at these appointments (MD, nurse, reimbursement specialist)?
   3. What monitoring tests are conducted at appointments?
   4. What types of conversations does the doctor have with you at these appointments?
5. [Progression] Since diagnosis, what are your main symptoms and how have your symptoms changed over time?
   1. Have your symptoms gotten worse?
   2. Have you developed any new symptoms since the initial diagnosis?
   3. Have you ever been hospitalized because of your IPF?
6. [Impact on Quality of Life] How do your symptoms currently impact your daily life?
   1. Which IPF symptoms are the most burdensome?
      1. *If not mentioned,* how has cough specifically impacted your daily life?
   2. How has IPF impacted…
      1. Your key relationships?
      2. Your work?
      3. Your hobbies?
      4. Experiences that you really care about?
   3. Do you require assistance walking into your doctor’s office? How far can you walk before you need to stop and rest?
   4. How challenging are doing pulmonary function tests (PFTs)?
7. [Caregivers] Do you have someone, a partner, family member or friend, which helps you manage your disease?
   1. How has your IPF impacted their life? *Probe on:* *Driving to appointments, helping with daily activities*
   2. Who drives to appointments?

1. [Comorbidities] Aside from IPF, do you have any other diseases or conditions? Please describe
   1. Do you take any medications for these diseases?
   2. How, if at all, have these conditions impacted your IPF?
   3. Do these other conditions hinder your ability to manage your IPF (e.g., keeping up with medications, etc.)?

**Treatment**

1. After diagnosis, how did the doctor first talk to you about treatment options for IPF?
   1. Did the doctor discuss treatment options at the same visit where you got your diagnosis? Did they wait?
   2. Who was involved in discussing treatment options (MD, nurse, etc.)?
   3. How did you feel about the treatment options the doctor described?
   4. What materials did you receive related to treatment options (e.g., website, brochures, etc.)?
   5. What pieces of information were most important to you? (e.g., efficacy, side effect profile, data, doctor recommendation)
   6. Did you already have thoughts about treatment?
2. Have you heard of any treatments that you and doctor have not discussed?
   1. How did you hear of this? What source?
3. Since diagnosis, what treatments have you received for IPF, if any?
   1. *Probe on pirfenidone / Esbriet and Ofev (nintedanib)*
   2. *Probe on oxygen, steroids, statins, CellCept/mychophenolate, proton pump inhibitors, pulmonary rehab etc.*
      1. What did your doctor say about how **[AGENT]** would work?
      2. How well do you think **[AGENT]** works? Why?
      3. What side effects have you noticed with **[AGENT]**?
4. [Oxygen] *if patient is using oxygen,* how does needing / using oxygen impact your quality of life?
   1. Have you experienced challenges accessing enough tanks?
   2. How many liters flow do you use at rest and with exertion?
   3. Has your doctor/nurse ever done a walk test with you to see how much oxygen you need? How often?
   4. Did you doctor/nurse ever explain to you how to use an oxygen tank? Or a durable medical equipment company?
   5. How many oxygen tanks do you need to carry when you go see your IPF doctor? Does anyone help you with this?
   6. When you were prescribed oxygen, did you immediately start wearing oxygen as prescribed?

***Moderator Direction****:*

- *Ask the following questions depending on screener and what the patient has taken for IPF. If patient has tried both Esbriet / Ofev, start with the agent they tried first, but then come back and ask questions about second agent.*
- *If patient has not tried Esbriet / Ofev skip to* ***Question 23****.*

1. When (date) did you start treatment with **[PIRFENIDONE, ESBRIET, OFEV (NINTEDANIB)]**? How long after diagnosis?
   1. How was the decision made to start this treatment?
      1. Probe on: physician direction/opinion vs. personal decision vs. shared decision
      2. Did you physician mention waiting before starting treatment with **[AGENT]**?
      3. Did your physician discuss both anti-fibrotic treatments? If yes, how did they decide on **[AGENT]?**
      4. How did potential side effects impact the choice of treatment?
      5. What were your thoughts when the doctor initially prescribed **[AGENT]**?
      6. Did you do your own research about this product? Where did you do this research?
2. How was/is your experience with **[PIRFENIDONE, ESBRIET, OFEV (NINTEDANIB)]**?
   1. When you were first prescribed **[AGENT]**, what instructions did the doctor provide regarding how to take this medication?
   2. What did your doctor say about how **[AGENT]** would work?
   3. How well do you think **[AGENT]** works? Why?
   4. What side effects have you noticed with **[AGENT]**?
      1. How have these side effects impacted your daily life?
      2. What side effect is the most harmful?
   5. What do you think was the key benefit of your taking **AGENT**? What do you think was the key drawback of your taking **AGENT**?
   6. What do you think about the dosing of **[AGENT]**? *Probe on BID, TID*
      1. How easy was it to integrate **[AGENT]** into your day-to-day life?
      2. How does this impact your compliance? Do you ever forget about a dose?
   7. Are/were there any other health care providers involved in your care and supporting you while you are taking **[AGENT]**? *Probe on nurses, pharmacists*
3. Have you ever needed to change the dose of **[PIRFENIDONE, ESBRIET, OFEV (NINTEDANIB]** from the dose that your doctor initially recommended to you? If so…
   1. Why? *Probe on side effects or something else*
   2. Did you ever reduce the dose of **[AGENT]**?
   3. Did you ever stop taking **[AGENT]** for a little while before starting again?
   4. Did you ever stop taking **[AGENT]** forever?
   5. *If answer is yes to b or d,* how did this strategy help?
4. Are you still taking **[PIRFENIDONE, ESBRIET, OFEV (NINTEDANIB)]**? ***If no:***
   1. What were the primary reasons you stopped treatment? *Probe on side effects, convenience, payer requiring patient to switch to generic pirfenidone*
   2. When did you stop? How long after initiating treatment?
   3. Did you switch to another medication? Which one?
      1. *If patient switched from Ofev to pirfenidone or vice versa ask questions about second agent*
5. [Reimbursement & OOP] What is your primary insurance?
   1. In your experience, has **[AGENT]** been covered by your insurance?
   2. Can you estimate the OOP costs associated with your IPF prescription?
      1. How much of a burden are OOP costs?
      2. Probe on: dynamic with other medication costs
   3. Have you had any support from anyone in navigating and paying for **[AGENT]**?
      1. **From who?**The company that makes **[AGENT]** (Genentech (Roche)/ Boehringer Ingelheim), Foundations, Specialty Pharmacy?
      2. *If yes,* have you ever had a lapse in funding?
      3. *If patient is on/was on Esbriet,* has this support changed at all in recent months? How?
6. *If patient is on/was on Esbriet,* has your insurance provider required you to switch to a different form of Esbriet called pirfenidone? ***If yes:***
   1. How did you first learn of this switch?
   2. How was this different form of Esbriet explained to you?
   3. How did you feel about this switch?
7. **[If patient has never tried Esbriet / Ofev]** Did any health care providers present treatments Esbriet and Ofev as options to you to treat your IPF? If so…
   1. How did health care providers describe these treatment options to you?
      1. What else did they introduce as treatment options?
   2. Are you waiting for something to happen before trying these treatments?
   3. What were your initial thoughts when you learned about these treatments?
   4. Did you do your own research about these treatments?
      1. Did you look them up on the internet? Were you given websites or brochures to review?
   5. Who made the ultimate decision about not starting these treatments, you, or your physician?
   6. What is your primary insurance? Was this decision at all impacted by potential costs?
   7. **If not** – did you learn about these treatments another way? How?
8. [Unmet Need] What, if anything, could current treatments improve on?
   1. What would you want to see with a novel treatment?
      1. Probe on: efficacy, side effects, dosing, convenience
9. [Trial Participation] Did your doctor ever suggest enrolling in a trial? What are your thoughts on this?
   1. Have you ever participated in a clinical trial? If so, what was that like?
10. [Awareness of Novel Therapies] Are you aware of any novel products in development for **IPF**?
    1. [If yes] How did you learn about these drugs?
    2. What are your impressions of these drugs?
    3. Do you bring these products up to your physician to discuss?

# PART 2

**TPP Testing**

*Moderator to switch off which product is shown first*

***Moderator Read:*** *Now I am going to tell you about a hypothetical product that we will call Product X/Y. For the purposes of our conversation, we are going to assume that Product X/Y is FDA approved for IPF. Product X/Y needs to be taken three times a day. Product X/Y is similar to another IPF drug, pirfenidone*

1. What is your initial reaction to **[PRODUCT]**?

1. What do you view as the most attractive features of **[PRODUCT]**? Any downsides?
   1. *If patient has experience with pirfenidone,* how do you view **[PRODUCT]** in comparison to Esbriet (pirfenidone)?

1. What are your impressions of the dosing and administration of **[PRODUCT]**?
   1. How would you feel if this drug were administered **intravenously** (via IV)? How would you feel this this agent was **inhaled**? Compare and contrast these types of administration.
2. What are your impressions of the safety profile of **[PRODUCT]**?
3. How do you feel about how well **[PRODUCT]** works?

1. Would you want to try **[PRODUCT]**? Why or why not?
   1. Would you ask your doctor to switch from your current treatment to **[PRODUCT]**? Why or why not?
      1. What would you need to know about **[PRODUCT]** to switch? (e.g., physician recommendation, other)
   2. Would you consider trying **[PRODUCT]** in combination with another IPF treatment?
      1. What questions would you have before trying combination treatment?
      2. What if both drugs were **oral** and taken multiple times a day?
      3. What if one drug was **oral** and the other was **IV or inhaled**?
   3. [If no] What types of improvements would you need to see to consider **[PRODUCT]**?

1. If this drug were available and you learned about it from your own research, would you actively seek it out?
   1. [If yes] How would you seek it out?

***Moderator Read:*** *Now I want to ask you about another, similar product called Product X/Y. Product X/Y is the same drug as Product X/Y but has a few differences, specifically in how well the drug works and safety.*

1. What is your reaction to **[PRODUCT]**?
   1. What are your impressions of the safety profile of **[PRODUCT]**?
   2. How do you feel about how well **[PRODUCT]** works?
   3. Would you want to try **[PRODUCT]**?
   4. Would you consider trying **[PRODUCT]** in combination with another IPF treatment? *Compare answer to other answer*
   5. If this drug were available and you learned about it from your own research, would you actively seek it out?
2. Product X has better safety/tolerability, and Product Y has better efficacy. How would you evaluate these two options? Which one is more attractive to you and why?
3. Any last thoughts?
